# Supplementary material for: Shear-induced assembly of a transient yet highly stretchable hydrogel based on pseudopolyrotaxanes
Source: Springer Nature journal article supplement (doi:10.1038/s41557-019-0235-8), 2019-04-01
Supplement: 41557_2019_235_MOESM27_ESM.mol [file 41557_2019_235_MOESM27_ESM.mol]

nchem.17122546B-comp7.mol
  ChemDraw02211913342D

  9  8  0  0  0  0  0  0  0  0999 V2000
   -2.1434    0.2062    0.0000 O   0  0  0  0  0  0  0  0  0  0  0  0
   -1.4289   -0.2062    0.0000 C   0  0  0  0  0  0  0  0  0  0  0  0
   -0.7145    0.2062    0.0000 C   0  0  0  0  0  0  0  0  0  0  0  0
    0.0000   -0.2062    0.0000 O   0  0  0  0  0  0  0  0  0  0  0  0
    0.7145    0.2062    0.0000 C   0  0  0  0  0  0  0  0  0  0  0  0
    1.4289   -0.2062    0.0000 C   0  0  0  0  0  0  0  0  0  0  0  0
    2.1434    0.2062    0.0000 O   0  0  0  0  0  0  0  0  0  0  0  0
    2.8579   -0.2062    0.0000 C   0  0  0  0  0  0  0  0  0  0  0  0
   -2.8579   -0.2062    0.0000 C   0  0  0  0  0  0  0  0  0  0  0  0
  1  2  1  0      
  2  3  1  0      
  3  4  1  0      
  4  5  1  0      
  5  6  1  0      
  6  7  1  0      
  7  8  1  0      
  1  9  1  0      
M  END
